# Supplementary material for: Multiferroicity in two-dimensional III–V indium pnictide optoelectronic materials
Source: Royal Society of Chemistry journal article supplement (doi:10.1039/d4cp04629c), 2025-01-01
Supplement: d4cp04629c1.pdf [file d4cp04629c1.pdf]

Supplementary information for

**Multiferroelectricity in two-dimensional Indium Pnictide  
optoelectronic materials**

Jingwen Jiang<sup>a</sup>, Zhuang Ma<sup>\*b</sup>, Yiguo Xu<sup>\*c</sup>

<sup>a</sup> *School of Information Engineering, Jiangmen Polytechnic, Jiangmen, 529030,  
China*

<sup>b</sup> *School of Physics and Telecommunication Engineering, Zhoukou Normal University,  
Zhoukou, 466001, China*

<sup>c</sup> *Academy for Advanced Interdisciplinary Studies, Southern University of Science and  
Technology, Shenzhen, 518055, China*

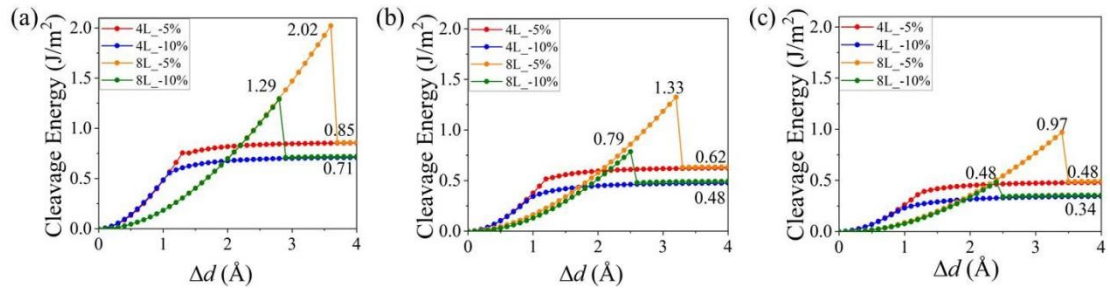

**Fig. S1** Cleavage energy for indium pnictides with different strain.

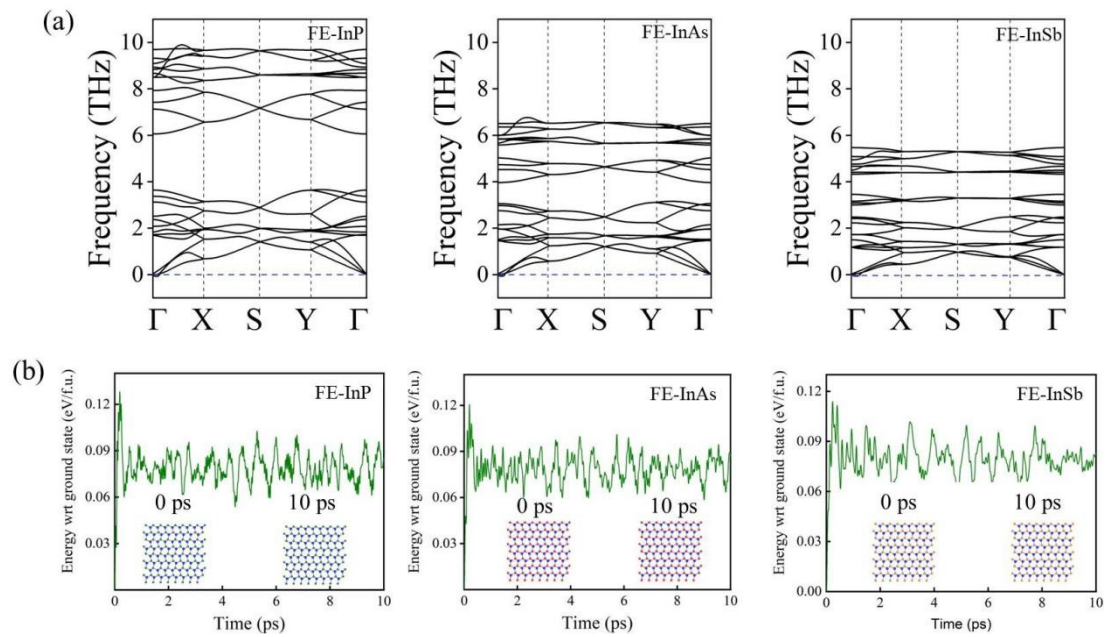

**Fig. S2** (a) Phonon spectrum and (b) AIMD simulation for monolayer indium pnictides, which suggests that the monolayer structure is stable with non-imaginary frequency phonon dispersion and no phase change.

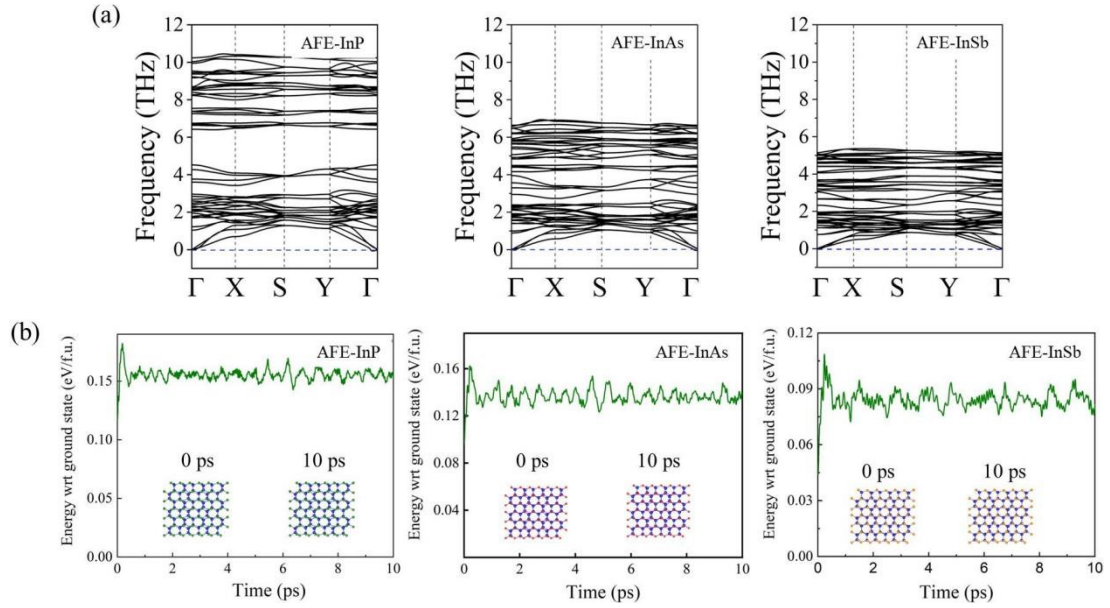

**Fig. S3 (a)** Phonon spectrum and **(b)** AIMD simulation for AFE indium pnictides, which suggest that the AFE structure is stable with non-imaginary frequency phonon dispersion and no phase change.

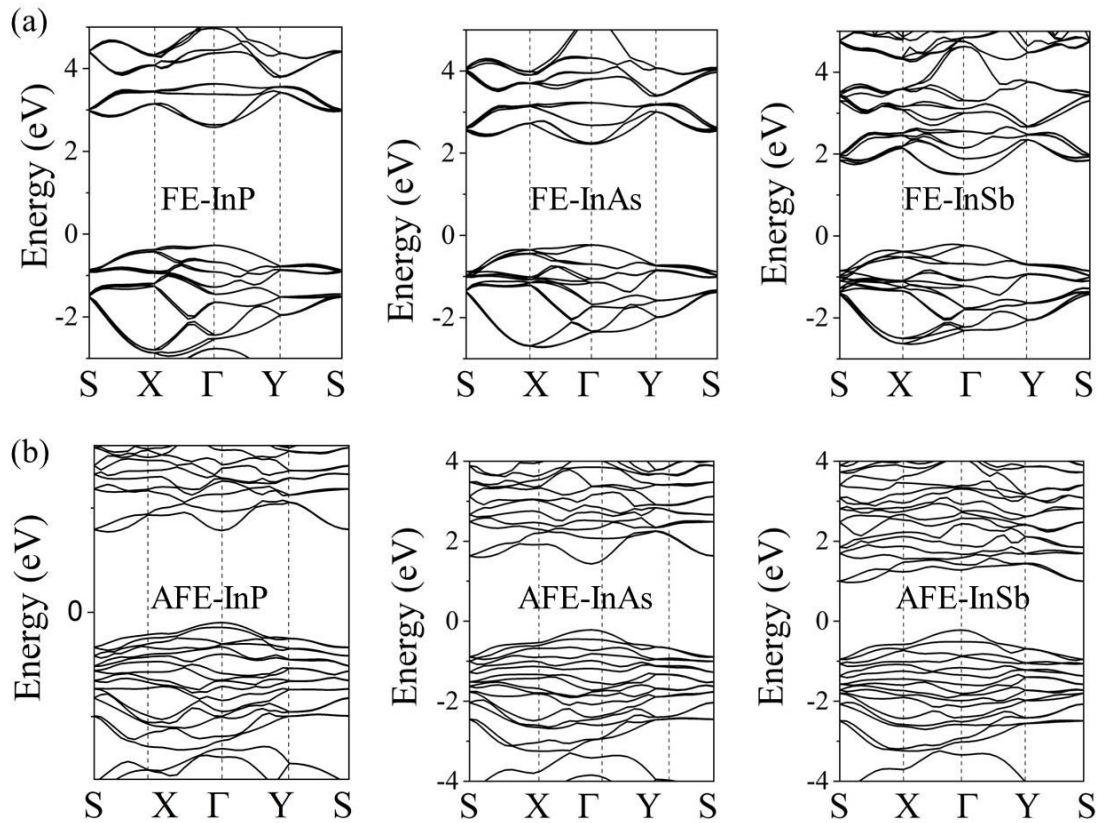

**Fig. S4** Band structure of FE (a) and AFE (b) phases of indium pnictides from HSE06+SOC.

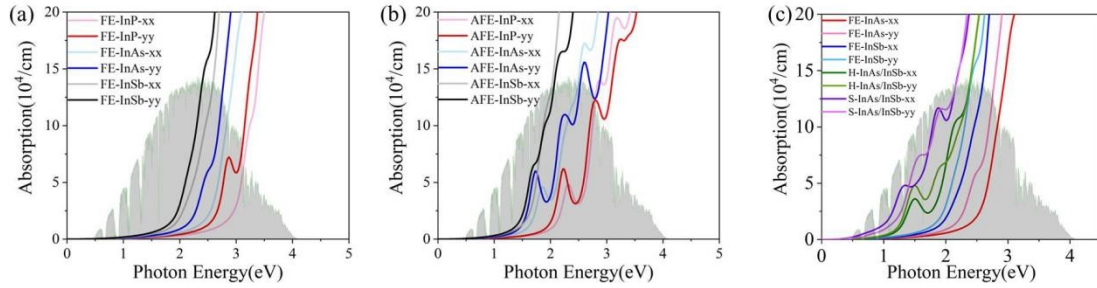

**Fig. S5** Optical absorption coefficient of FE (a) and AFE (b) of indium pnictides, (c) heterojunction and superlattice of InAs/InSb phases. The reference air-mass 1.5-solar spectral irradiance is plotted in gray shadow.

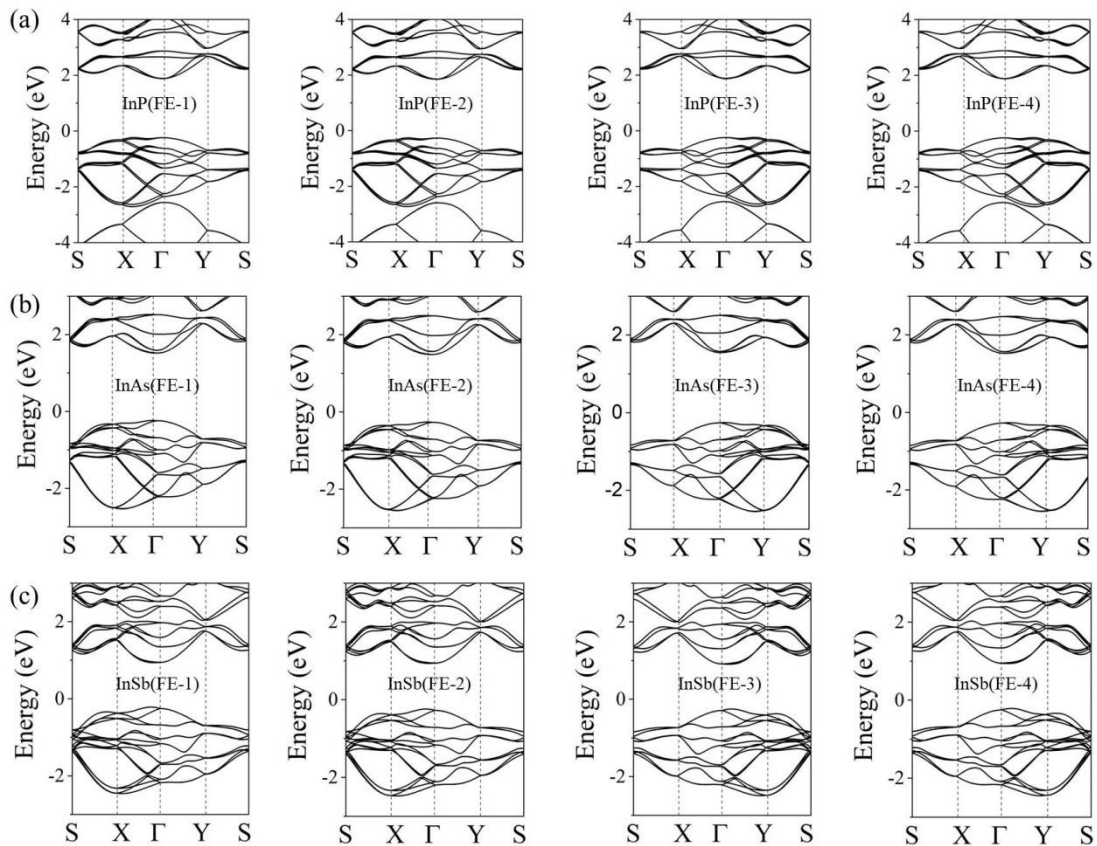

**Fig. S6** Electronic band structures with SOC for indium pnictides monolayers with FE ( $Pca2_1$ ) symmetry.

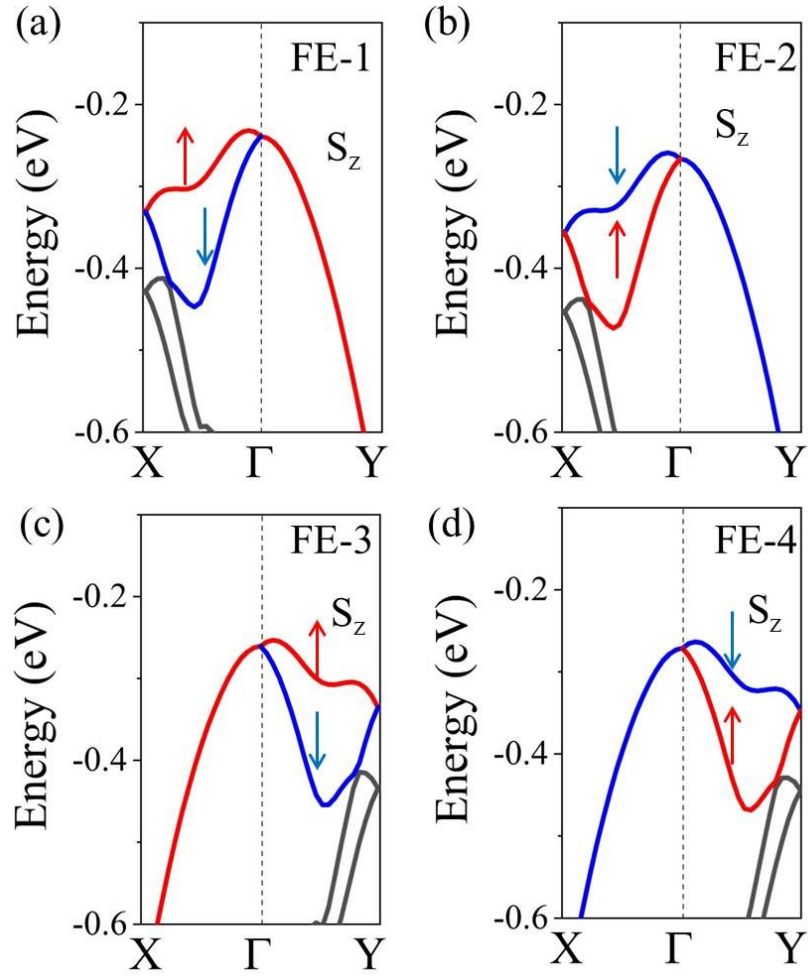

**Fig. S7** The highlighted spin-split bands around VBM region of InAs monolayer. The splitting bands along  $\Gamma$ -Y/X (spin degenerate/splitting) and  $\Gamma$ -X/Y (spin degenerate/splitting) high-symmetry lines around VBM for  $FE_{A/B}$  phases indicate the anisotropy flipping feature during the FC phase change process. The spin up and down property is inverted accompanied by the FE-1/2 phase change, in which the red and blue arrows indicate  $S_z$  (up) and  $-S_z$  (down) spin orientation in the momentum space, respectively.

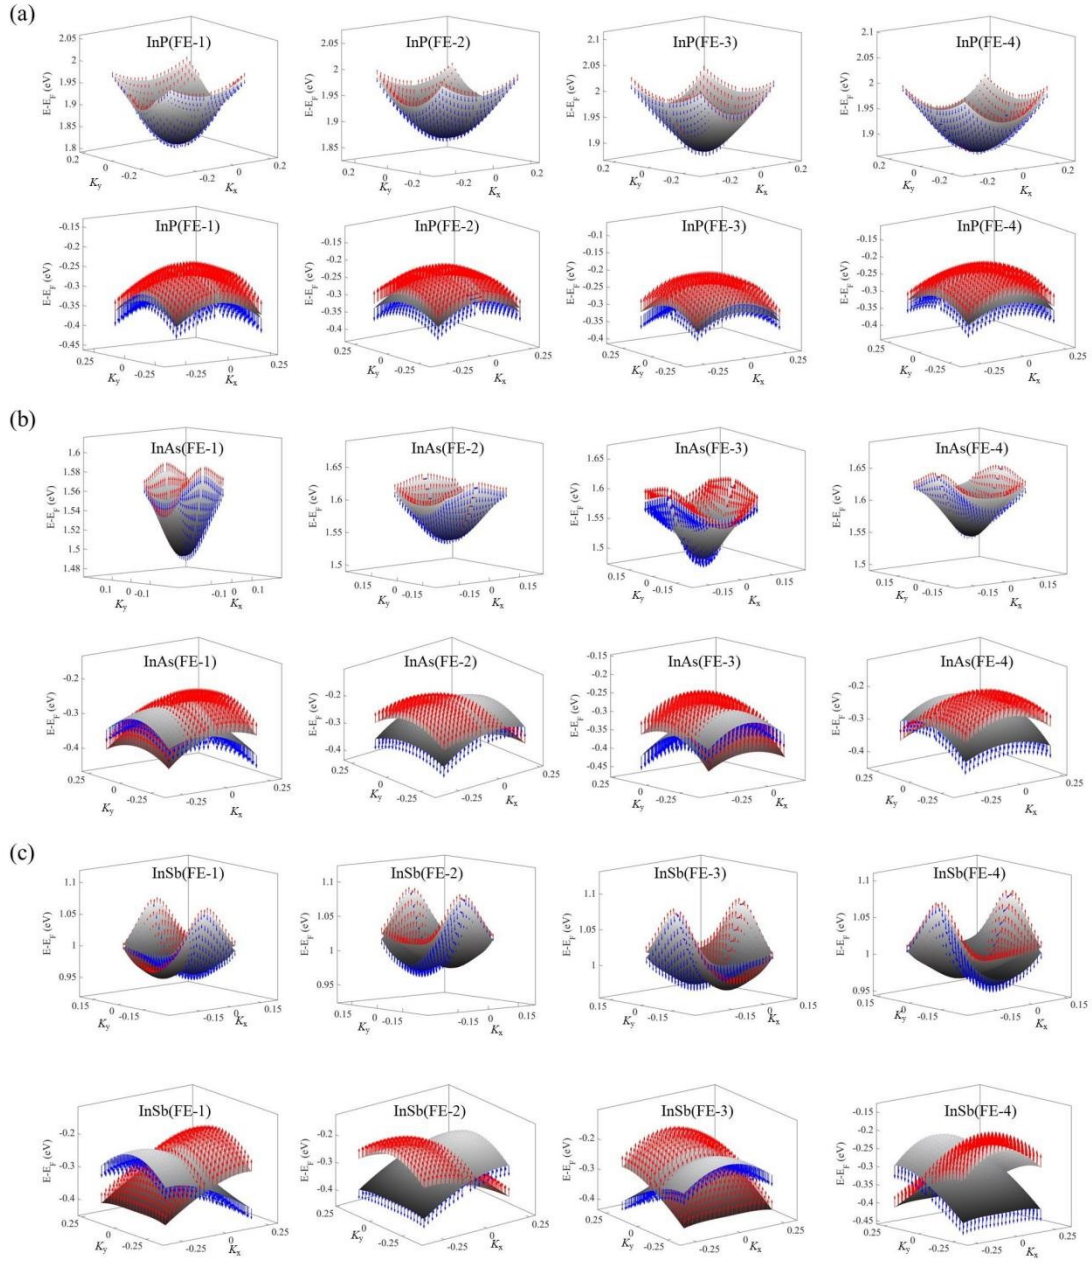

**Fig. S8** (a-c) Switchable spin texture projected to the  $k$  space for the upper and lower bands of monolayer indium pnictides around CBM and VBM, which is expected by reversing the in-plane ferroelectric polarization.

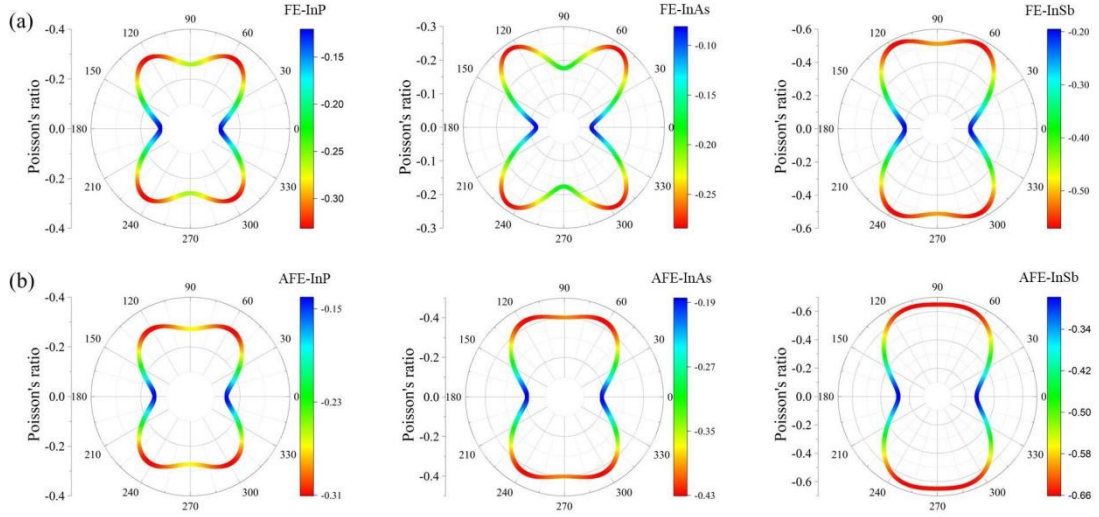

**Fig. S9** Anisotropic in-plane NPR response for 2D FE (a) and AFE (b) indium pnictides.

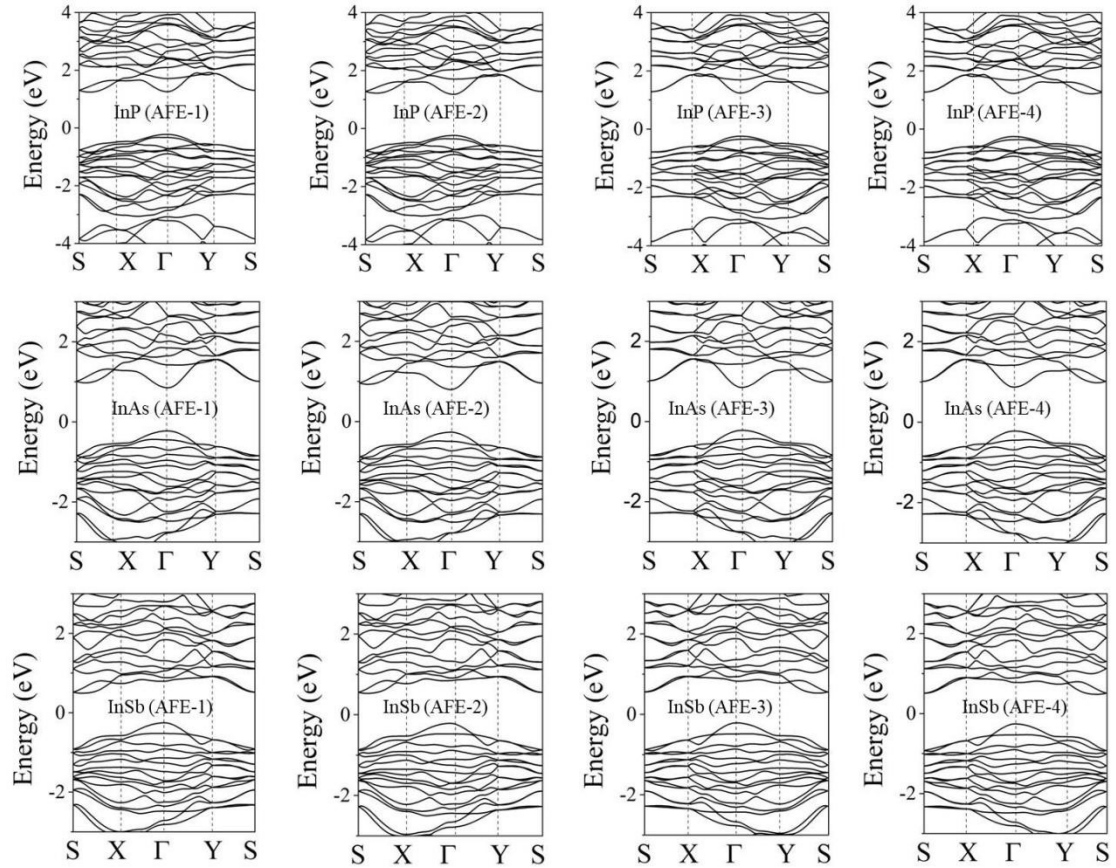

**Fig. S10** Electronic band structures with SOC for indium pnictides with AFE ( $P2/c$ )

symmetry.

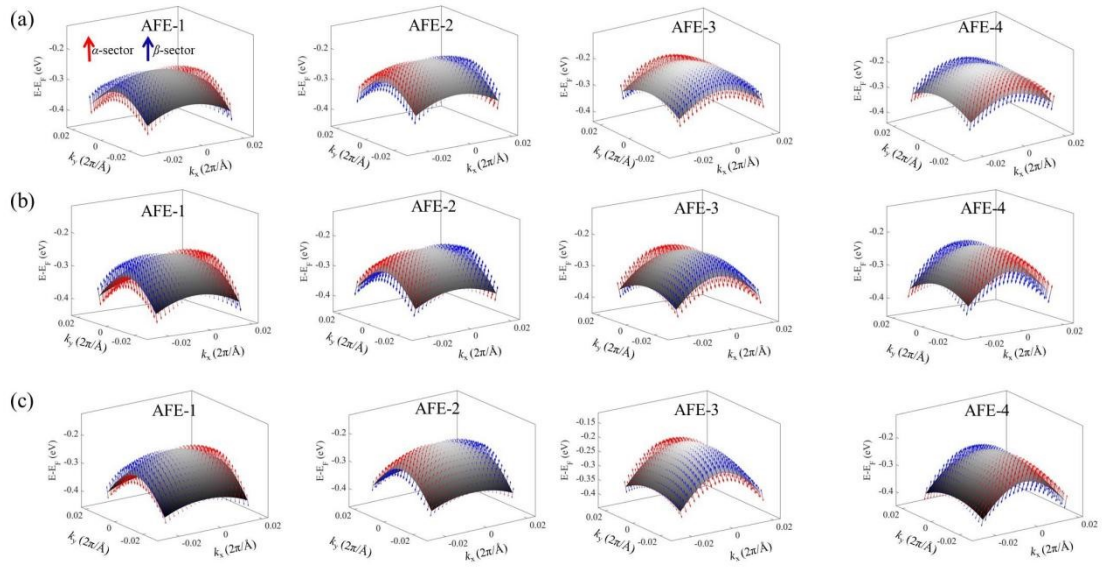

**Fig. S11** (a-c) Switchable hidden spin texture projected to the  $k$  space for the upper and lower bands of AFE indium pnictides around VBM.
